# Supplementary material
Source: PubMed Central journal article supplement (PMC5836508)
Supplement: NIHMS943909-supplement-Supplemental_Figures_and_Legends.pdf [file NIHMS943909-supplement-Supplemental_Figures_and_Legends.pdf]

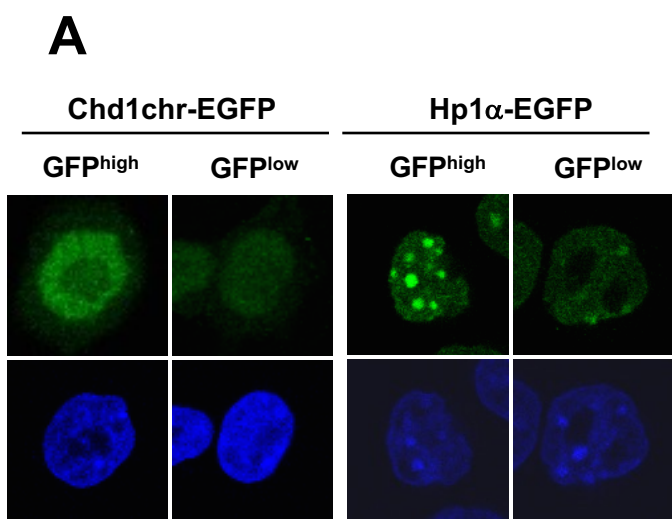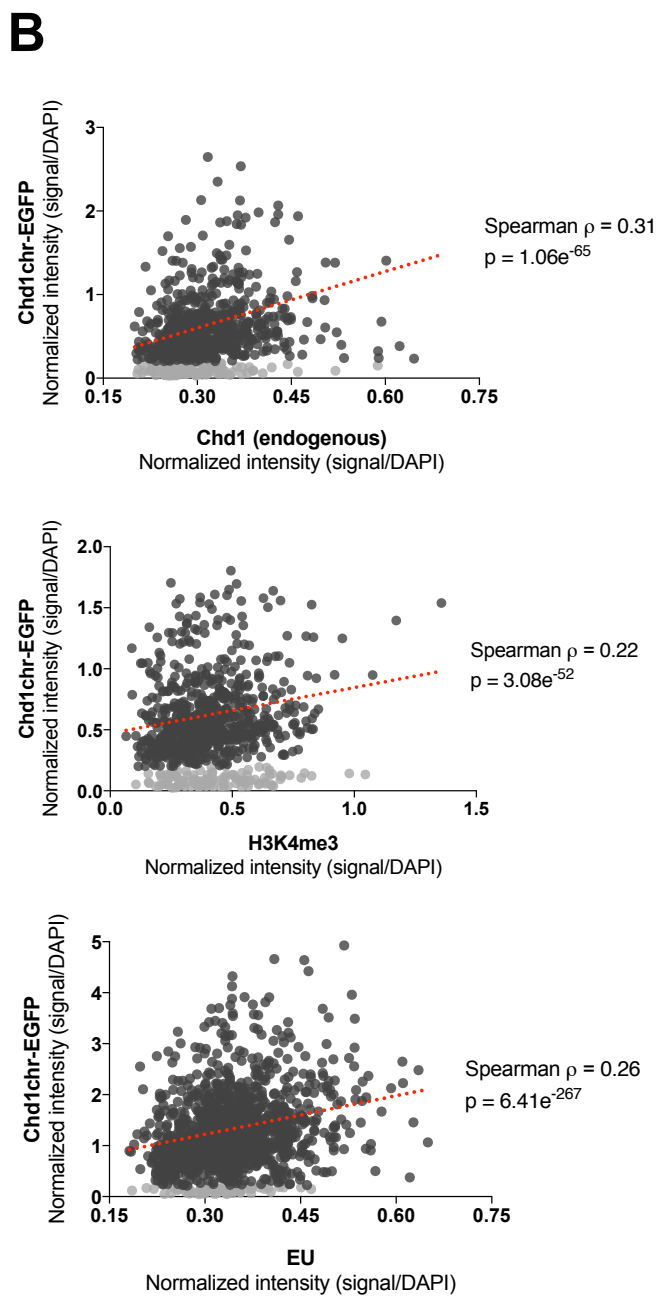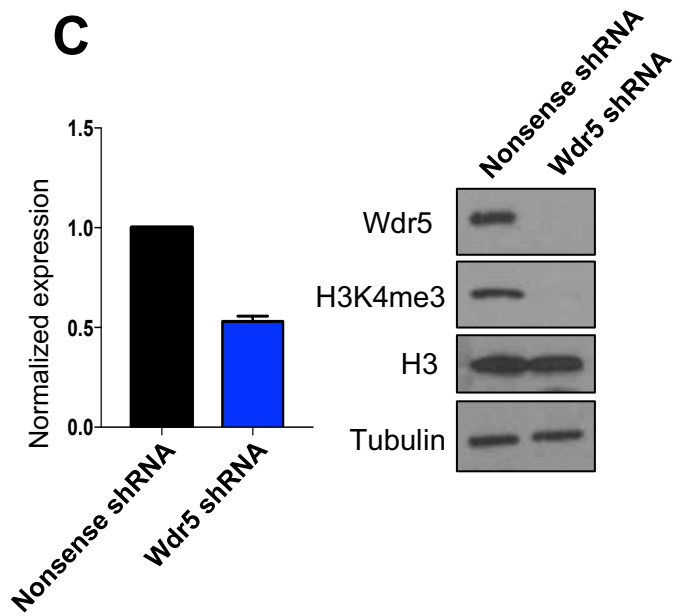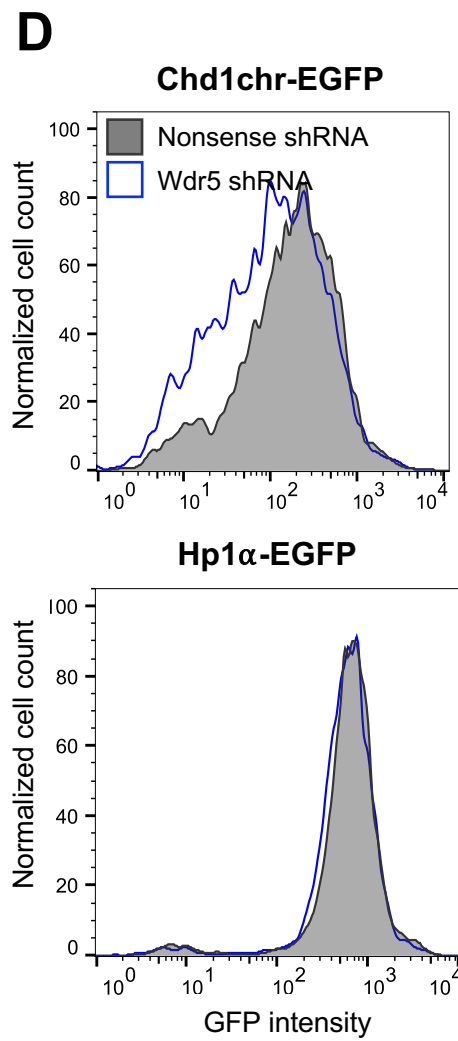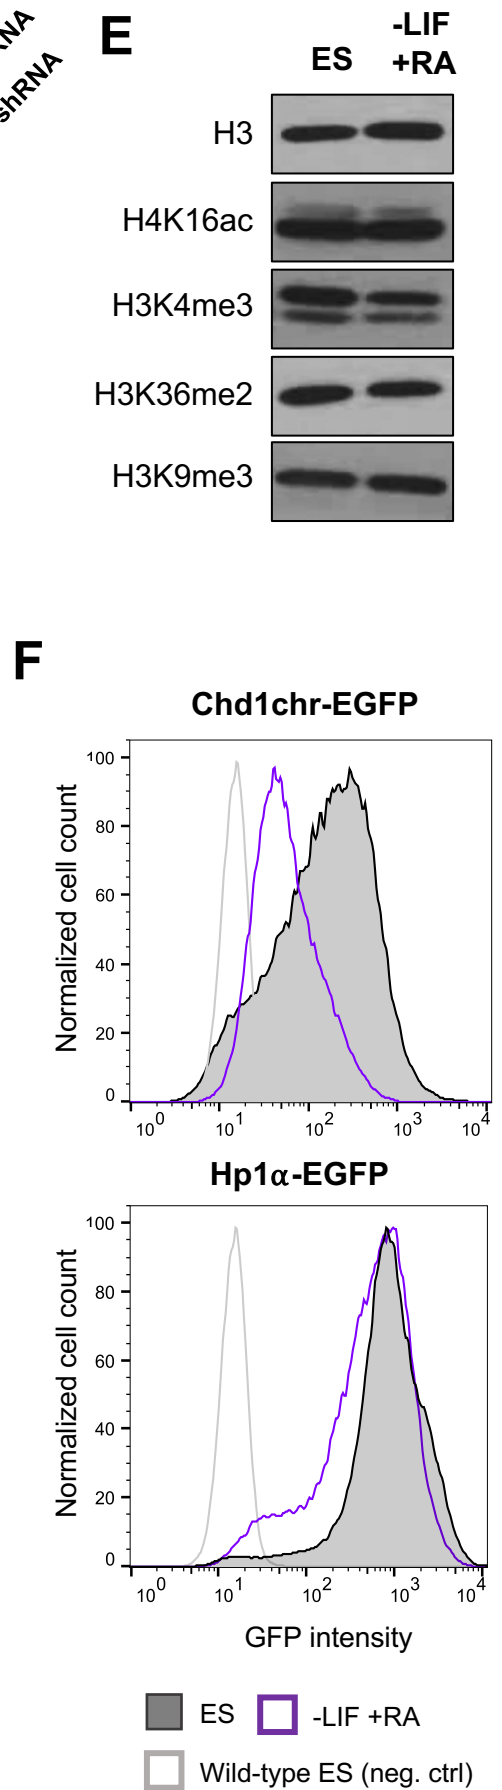

**Figure S1, related to Figure 1. Characterization of Chd1chr-EGFP and Hp1 $\alpha$ -EGFP reporters in ES cells.**

- (A) Fluorescence imaging of the Chd1chr-EGFP and Hp1 $\alpha$ -EGFP reporters.
- (B) Correlation of Chd1chr-EGFP reporter signal with endogenous Chd1, H3K4me3 and nascent transcription (EU). single-cell quantification of immunofluorescence for the indicated markers was performed. Cells with background levels of EGFP signal (grey points) were removed from the analysis.
- (C) mRNA and protein expression levels of Wdr5, a component of the MLL1 complex that deposits H3K4 methylation, upon transduction of ES cells with non-targeting or Wdr5-specific shRNAs.
- (D) Flow cytometry analysis of Chd1chr-EGFP and Hp1 $\alpha$ -EGFP reporter fluorescence levels upon knock-down of Wdr5. Fluorescence was assayed 3 days post-transduction.
- (E) Analysis of chromatin marks upon RA-mediated differentiation of ES cells for 2 days. ES cells grown in serum/LIF were used as control.
- (F) Analysis of reporter fluorescence upon RA-mediated differentiation of ES cells for 2 days. ES cells grown in serum/LIF were used as control. Wild-type, non-fluorescent ES cells were used as negative controls for flow cytometry. A minimum of two biological replicates were performed for all experiments.

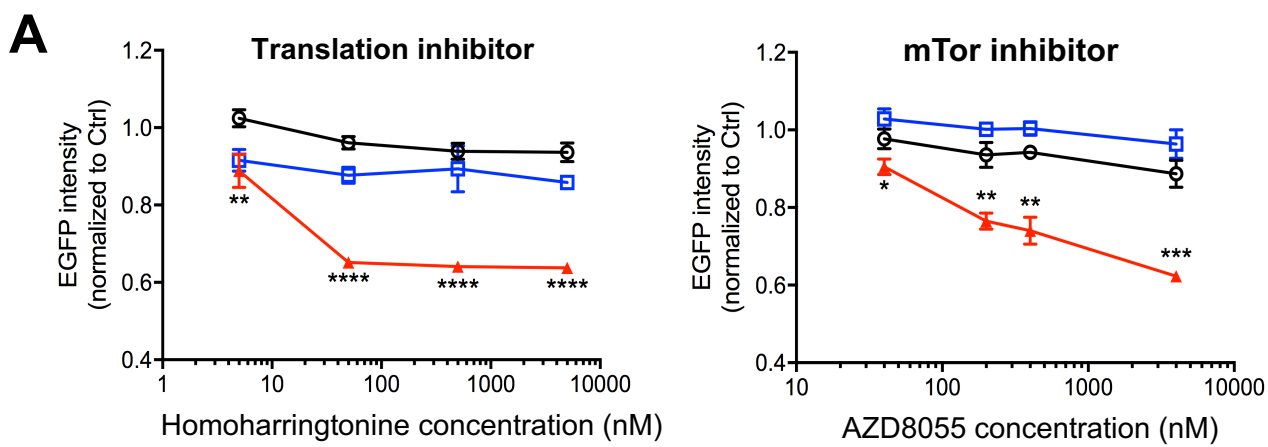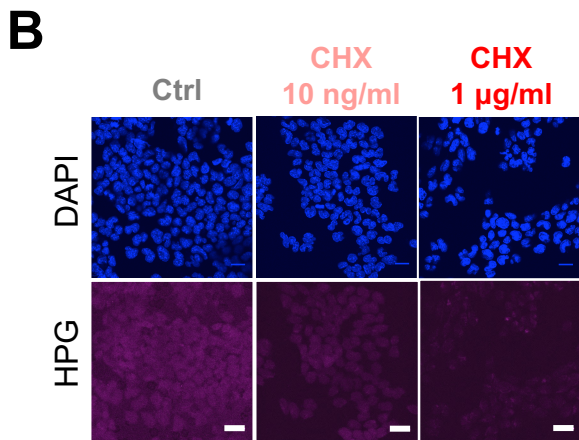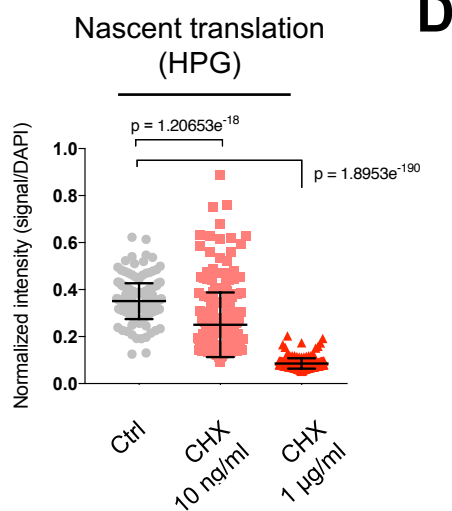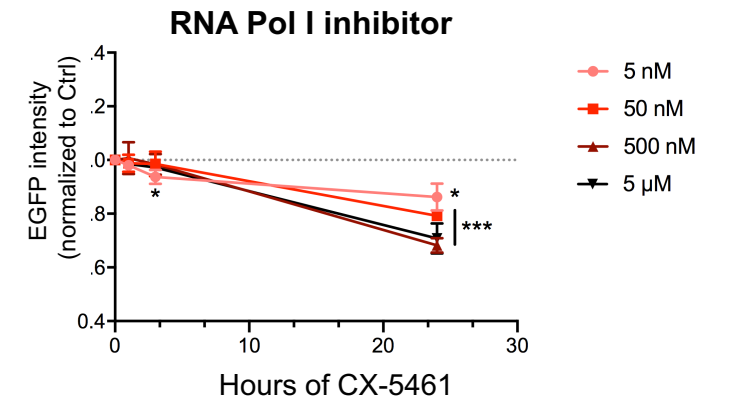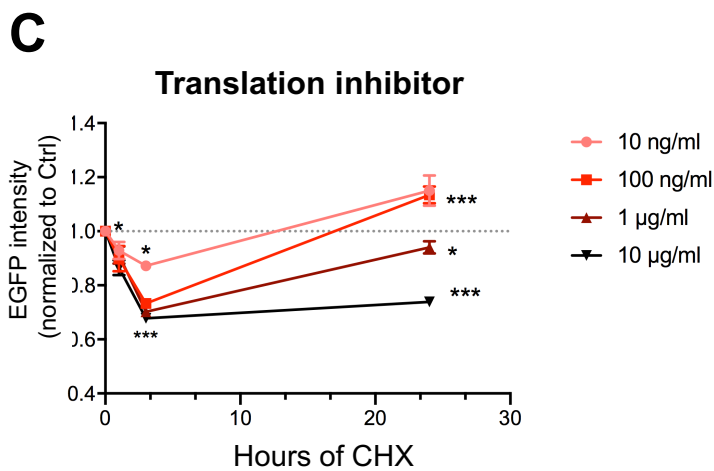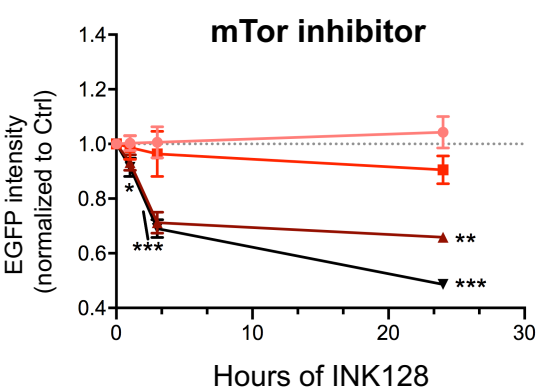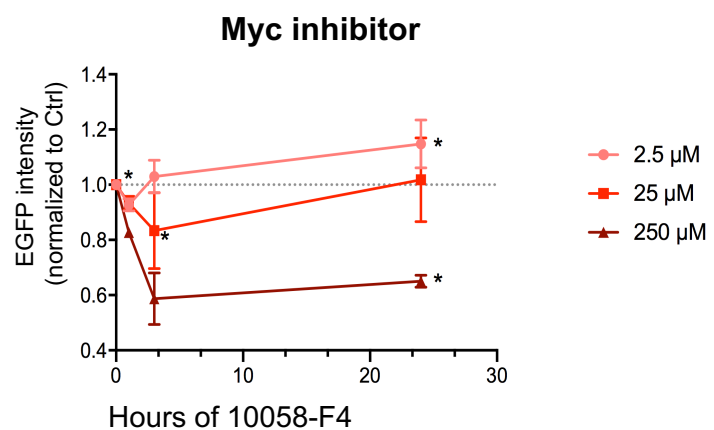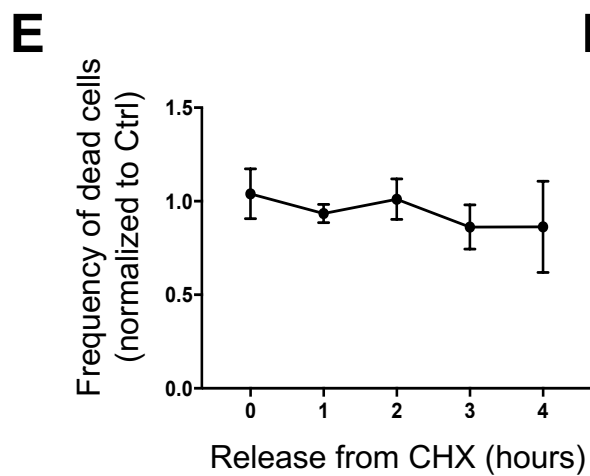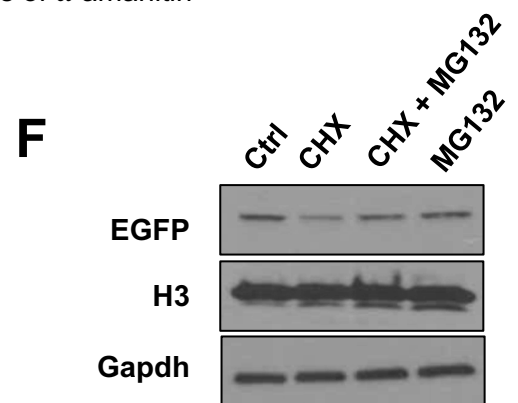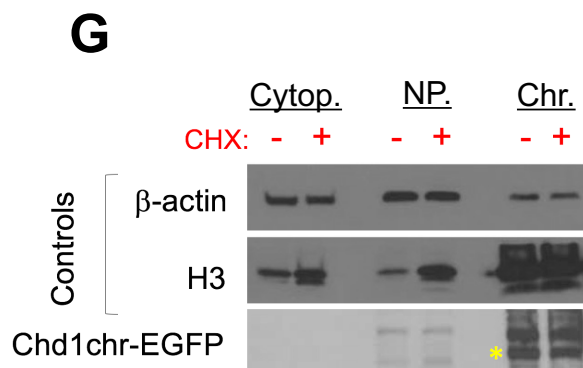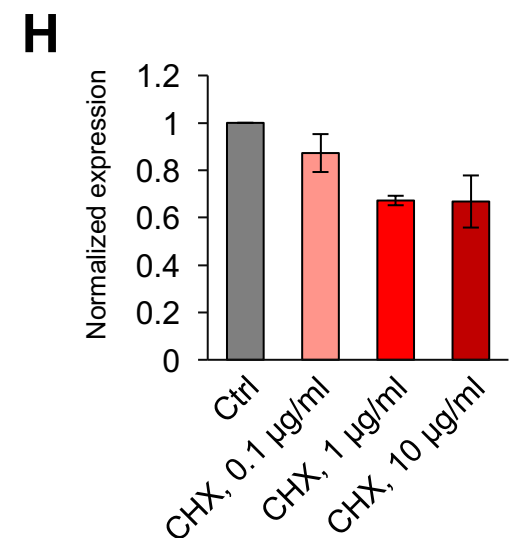

**Figure S2, related to Figure 2. Characterization of the reporter response to small molecule-mediated inhibition of indicated cellular pathways.**

- (A) Response of the Chd1chr-EGFP, Hp1 $\alpha$ -EGFP and control EGFP ES cells to inhibition of translation or mTor for 3 hours using independent inhibitors from those in Figure 2. Cells were treated with DMSO as control. Graphs show mean  $\pm$  SD of at least 3 technical replicates and are representative of 2 biological replicates. Statistical significance was determined by a two-tailed Student's t-test.
- (B) Fluorescence imaging of nascent translation by HPG incorporation upon DMSO or CHX treatment. Scale bars represent 20  $\mu$ m. Right panel shows quantification of HPG signal. Statistical analysis performed is Mann Whitney *U* test. Error bars represent mean  $\pm$  SD of at least 3 technical replicates.
- (C) Chd1chr-EGFP reporter fluorescence levels upon treatment with varying doses of translation, mTor and Myc inhibitors for up to 24 hours. Cells were treated with DMSO as control.
- (D) Chd1chr-EGFP reporter fluorescence levels upon treatment with varying doses of Pol I and Pol II inhibitors for up to 24 hours. Cells were treated with DMSO as control.
- (E) Assessment of cell death of CHX-treated ES cells by SYTOX Blue incorporation. Error bars show mean  $\pm$  SD of 4 technical replicates and are representative of at least 3 biological replicates.
- (F) Partial rescue of Chd1chr-EGFP fusion protein levels in whole-cell extracts upon inhibition of translation (CHX)  $\pm$  inhibition of the proteasome (MG132). Error bars show mean  $\pm$  SD of 2 biological replicates. Statistical tests are two-tailed t-test with Welch's correction when applicable. \*\*, \*\*\*, \*\*\*\* =  $p < 0.01, 0.001, 0.0001$ .
- (G) Chd1chr-EGFP protein levels in the cytoplasm, nucleoplasm and chromatin upon DMSO or CHX treatment (1 mg/ml) for 3 hours. Asterisk denotes the specific band with correct molecular weight. (H) Chd1chr-EGFP mRNA expression levels upon DMSO or CHX treatment for 3 hours. Error bars show mean  $\pm$  SD of 3 technical replicates. Graph is representative of 2 biological replicates.

**A**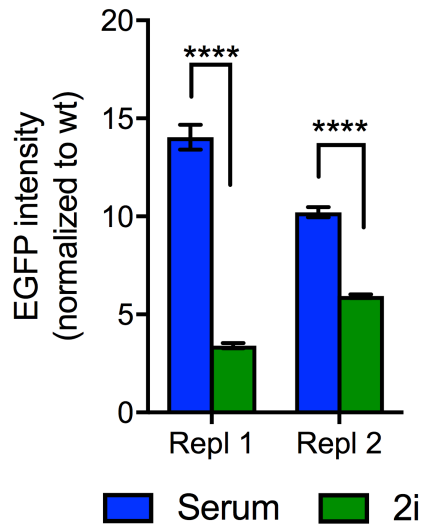**B**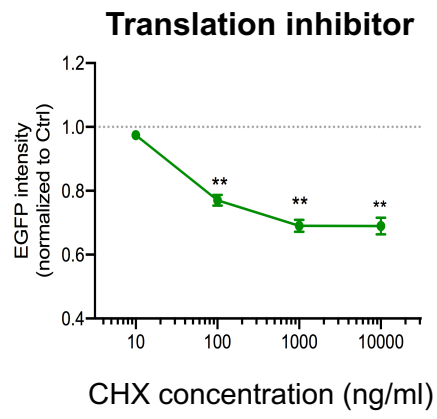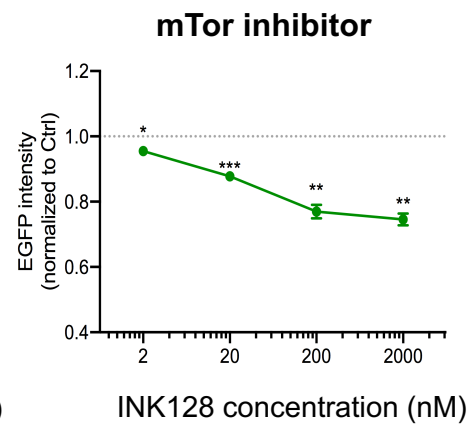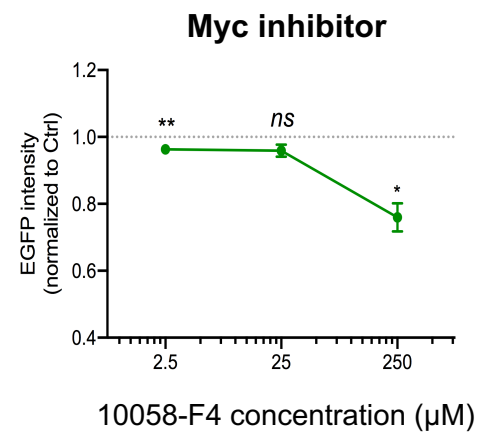**C**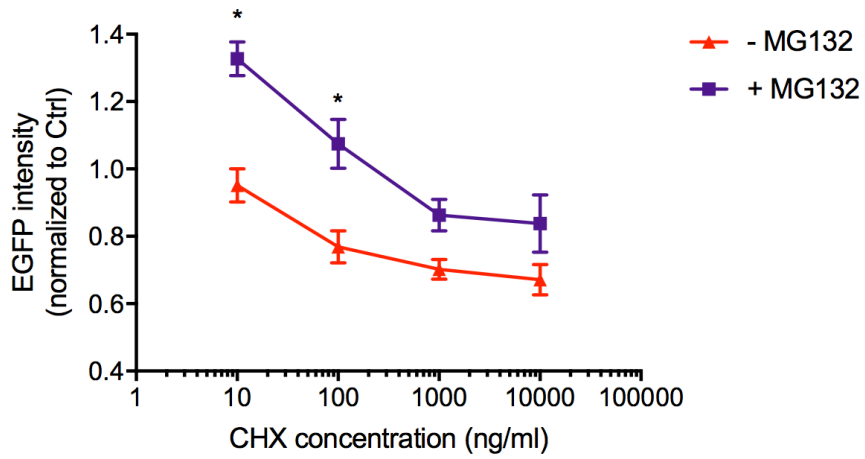

**Figure S3, related to Figure 2. Reporter expression and sensitivity to inhibition of translation and growth pathways in 2i conditions.**

- (A) EGFP reporter expression in cells cultured in 2i or serum conditions. Fluorescence signal was normalized to wild-type (non-fluorescent) E14 cells. Error bars show mean  $\pm$  SD of at least 8 technical replicates.
- (B) Normalized fluorescence levels of the Chd1chr-EGFP reporter in 2i/LIF upon small molecule-mediated inhibition of indicated pathways for 3 hours.
- (C) Normalized fluorescence levels of the Chd1chr-EGFP reporter in 2i/LIF upon partial rescue of the effects of CHX  $\pm$  proteasome inhibition by MG132. Data represent mean  $\pm$  SD of 2 biological replicates. \*, \*\*, \*\*\* =  $p < 0.01$ ,  $0.001$ ,  $0.0001$ ; ns = not significant.

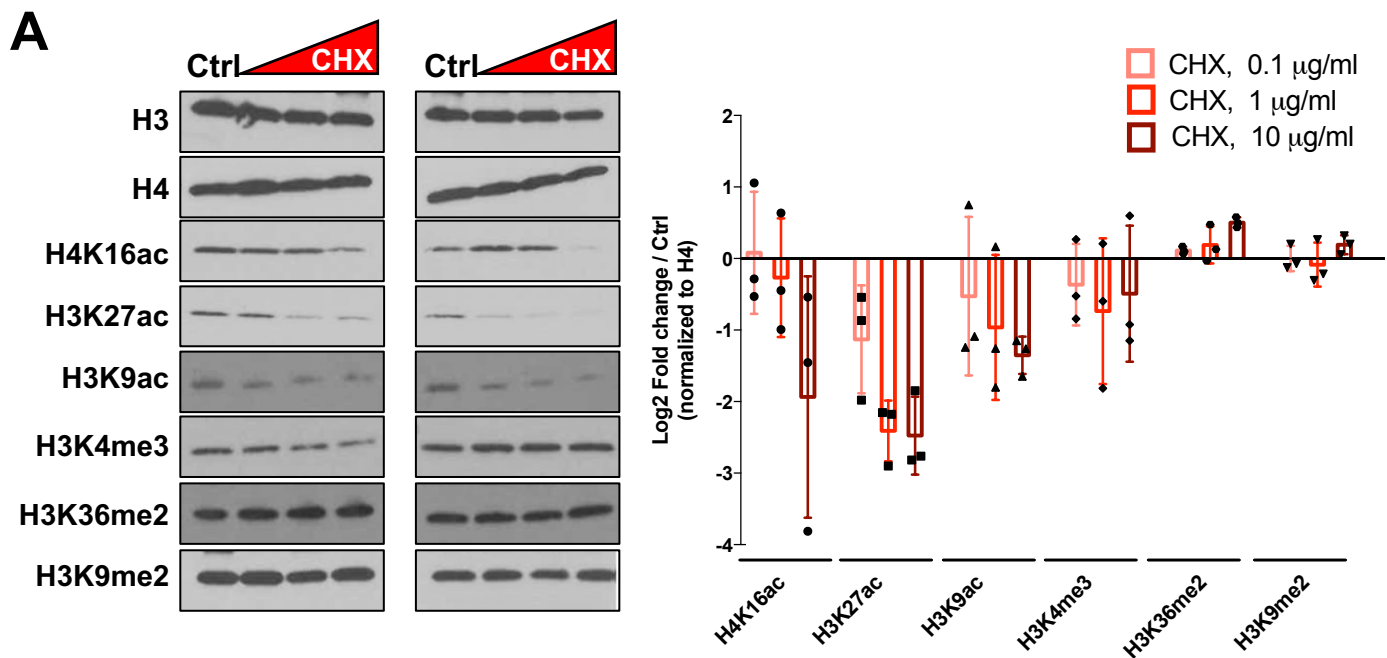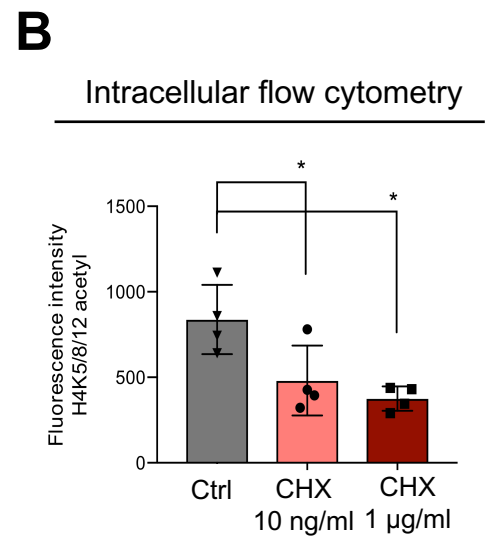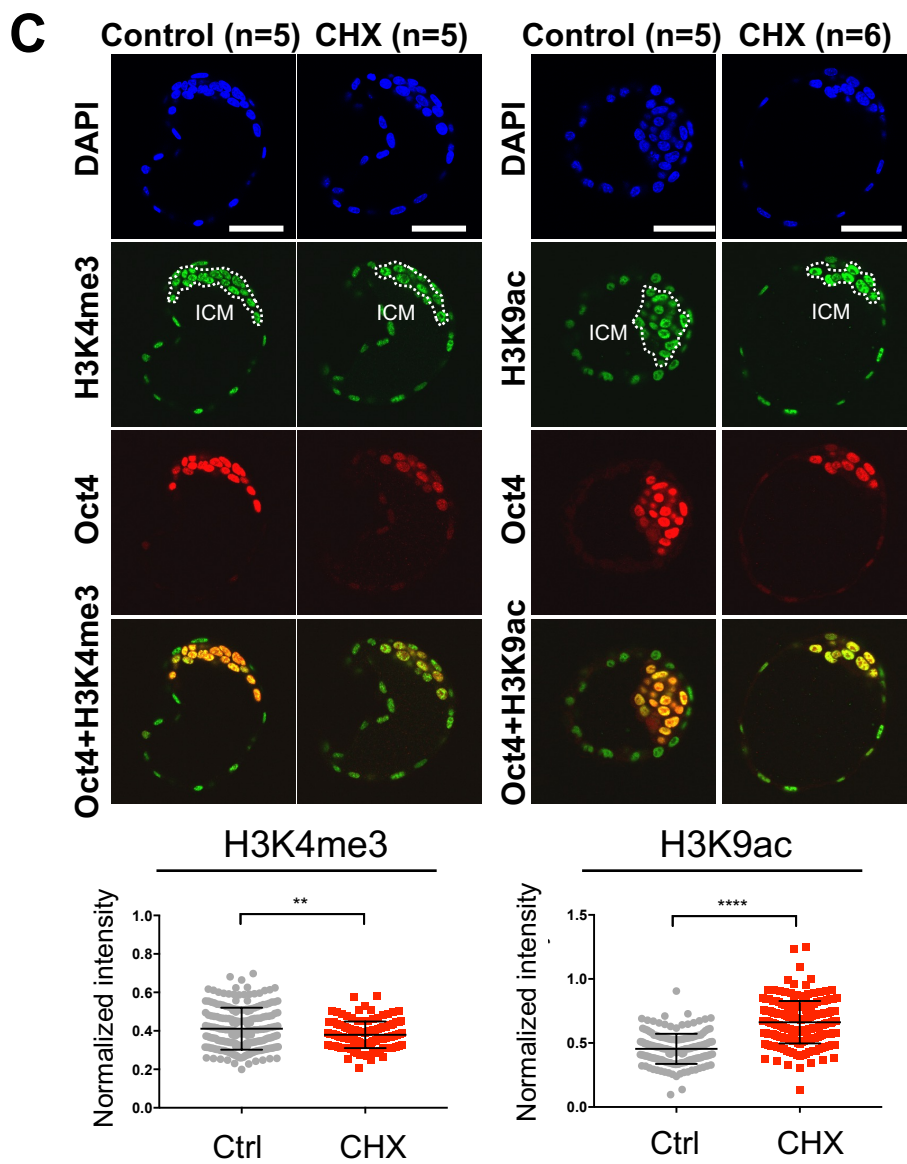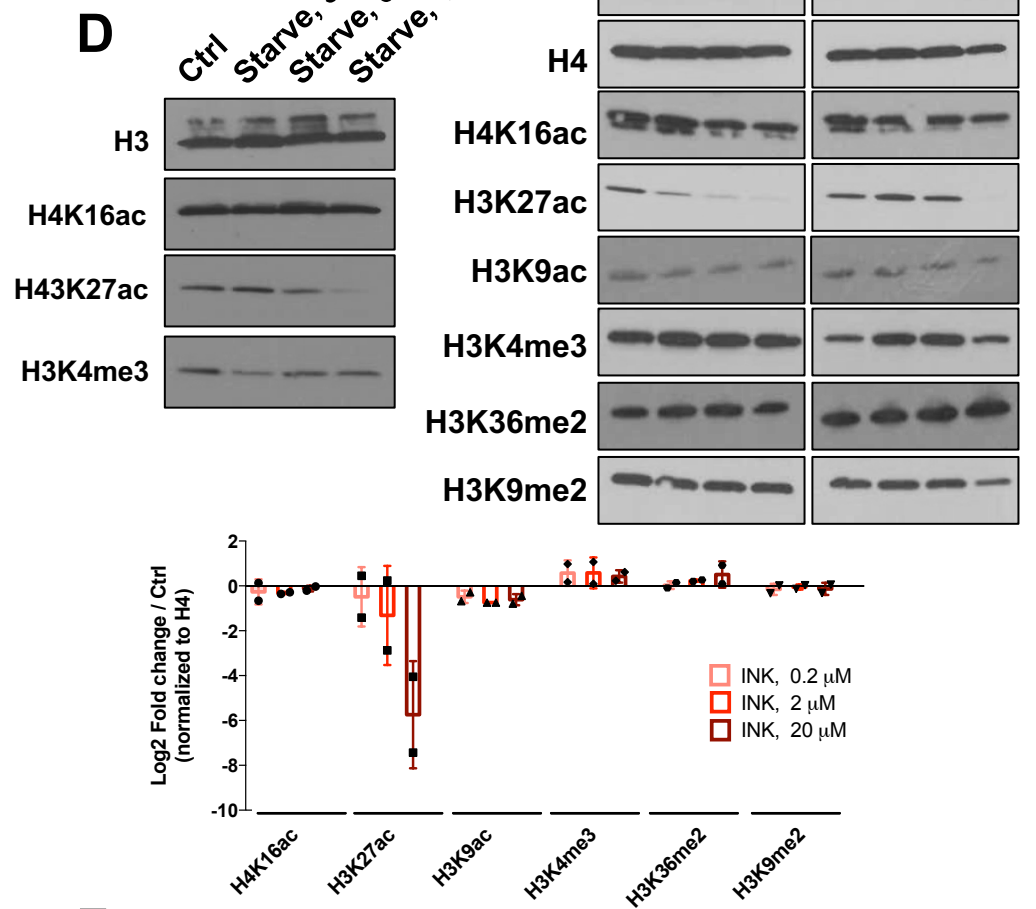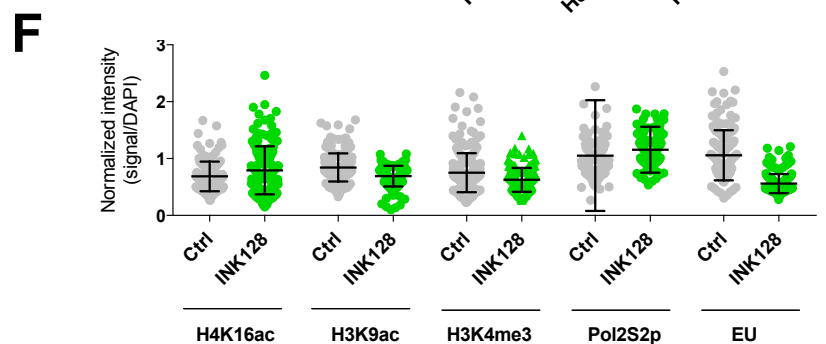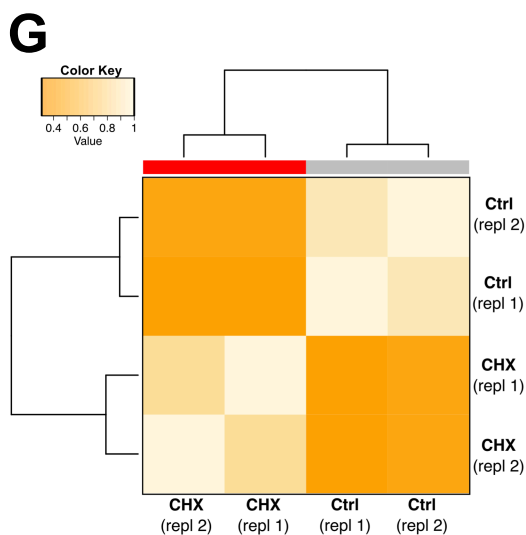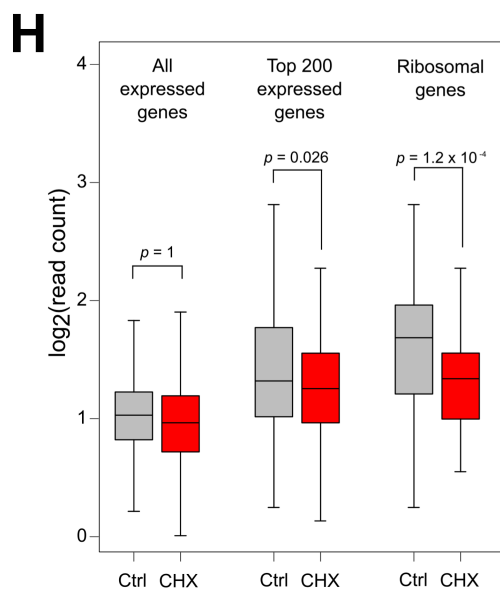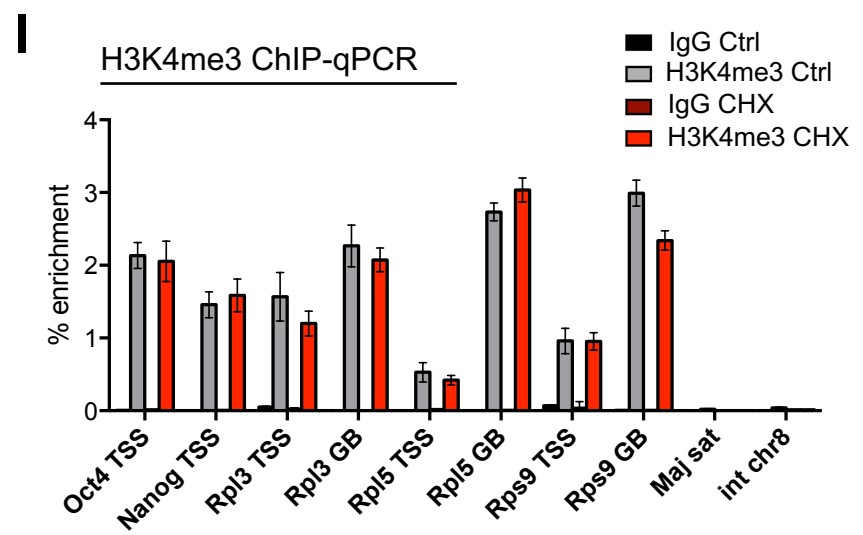

**Figure S4, related to Figure 3. Chromatin response to inhibition of translation in ES cells and blastocysts.**

- (A) Biological replicates of the western blot analysis shown in Figure 3A. Right panel shows quantification of the 3 biological replicates.
- (B) Intracellular flow cytometry analysis of H4 acetylation (H4K5,8,12) in DMSO- or CHX-treated (3 hours) ES cells. Data shown are representative of 2 biological replicates. Statistical significance was determined by Mann Whitney *U* test. \*\*\*\* =  $p < 0.0001$ .
- (C) Immunofluorescent detection of H3K4me3 and H3K9ac in control or CHX-treated (3 hours, 1 mg/ml) E4.5 blastocysts. Scale bars denote 50  $\mu\text{m}$ . Bottom panels show quantification of the H3K4me3 or H3K9ac signal in each Oct4+ cell. Statistical significance was determined by Welch's two tailed t-test. \*\*, \*\*\* =  $p < 0.01, 0.001$ .
- (D) Western blot analysis of euchromatin marks in response to serum starvation for the indicated durations. Histone extracts from unstarved cells were used as controls. Figure represents two biological replicates.
- (E) Western blot analysis of euchromatin and heterochromatin marks in response to 3h treatment with the mTor inhibitor INK128. Data are quantified and reported as in (A).
- (F) Quantification of immunofluorescence staining of chromatin marks and nascent transcription (EU) in E4.5 blastocysts incubated with INK128. Blastocysts were treated as in Figure 3C.
- (G) Heatmap of H4K16ac ChIP-seq replicate correlation at the top 1000 most highly expressed genes in ES cells.
- (H) H4K16ac ChIP-seq read abundance over all expressed genes or gene subsets.
- (I) ChIP-qPCR for H3K4me3 enrichment over TSSs and gene bodies in DMSO- or CHX-treated cells (1  $\mu\text{g/ml}$ , 3 hrs). Error bars show mean  $\pm$  SD of 3 technical replicates. Graph is representative of 2 biological replicates.



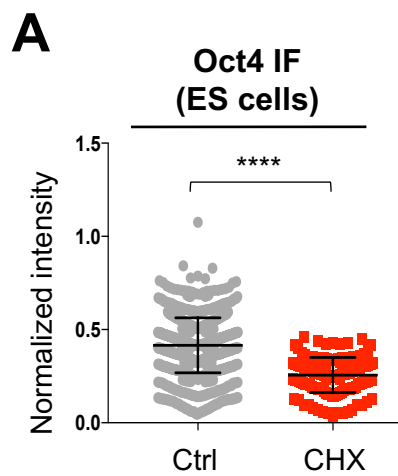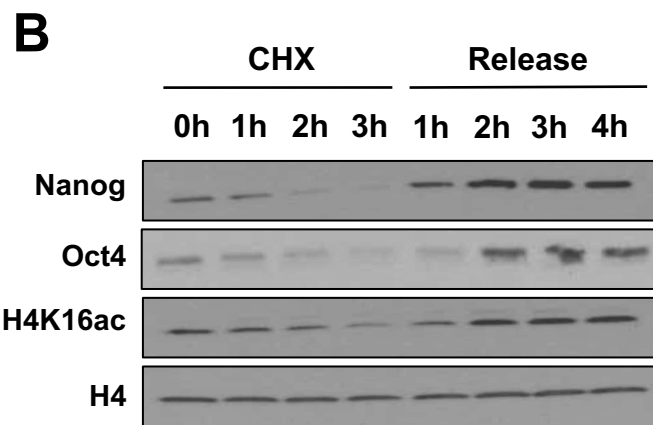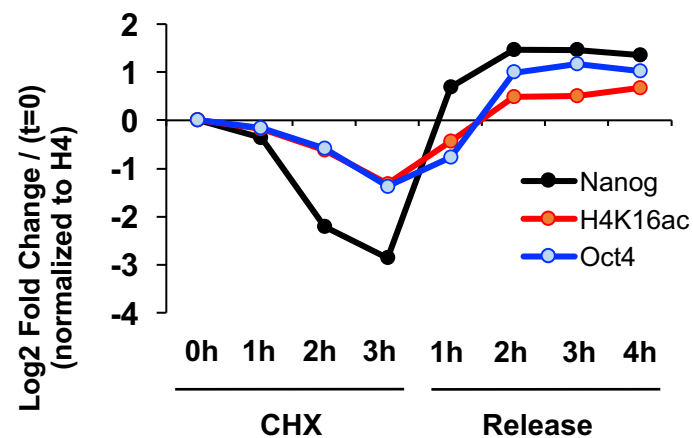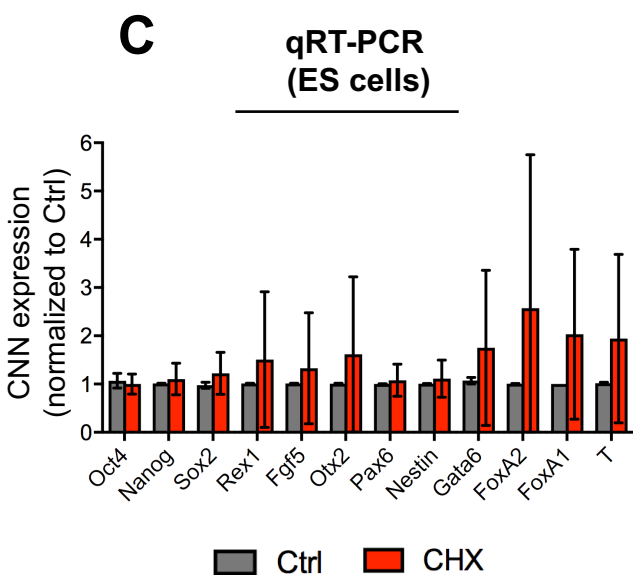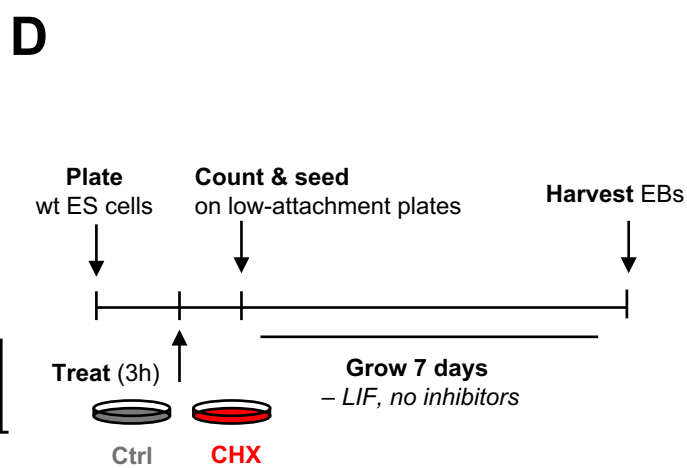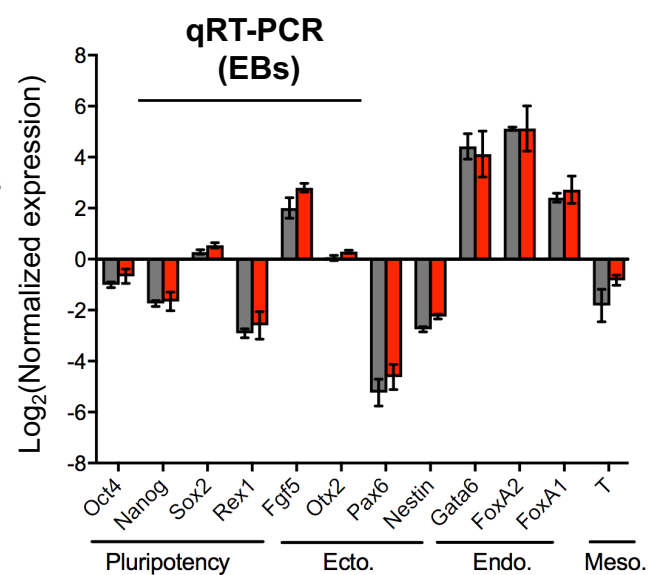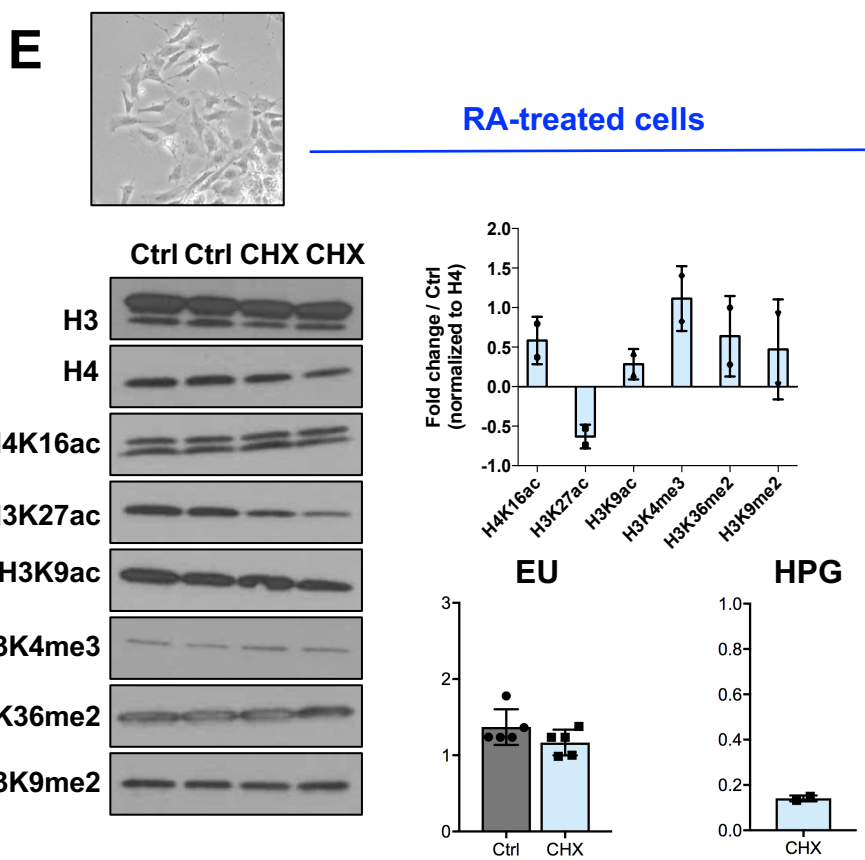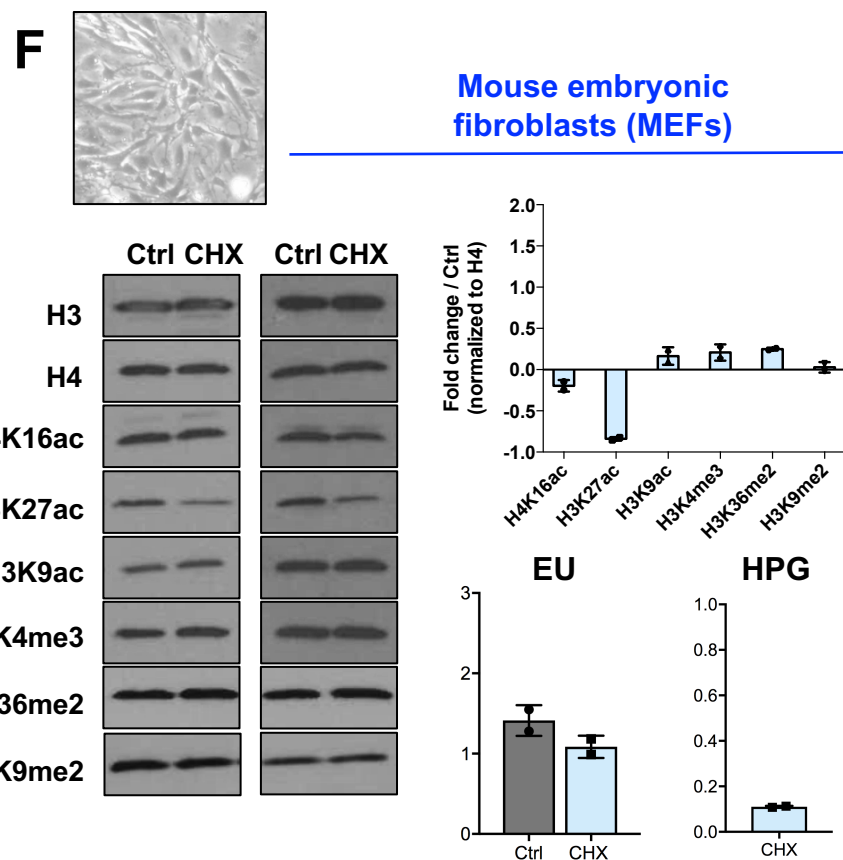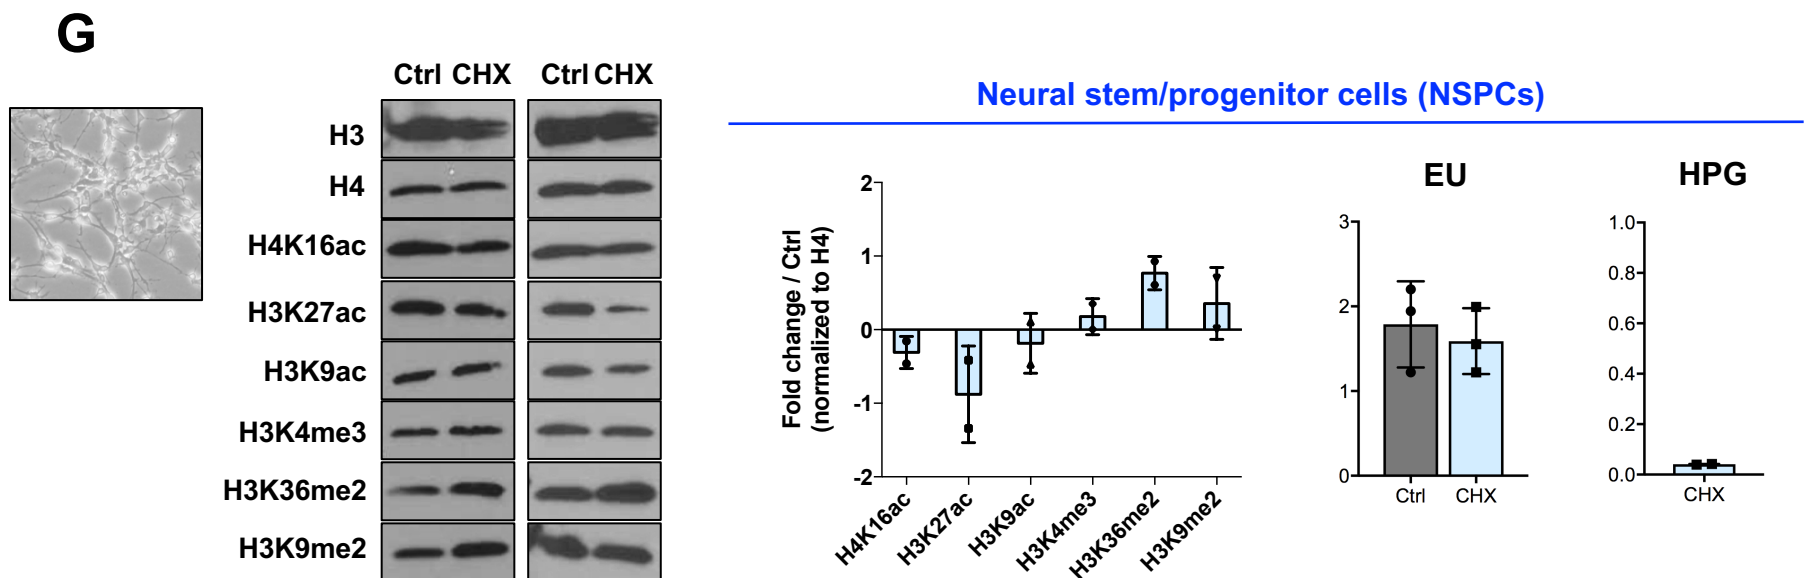

**Figure S5, related to Figure 5. Effects of translation inhibition on ES cell pluripotency and on non-pluripotent cells.**

- (A) Quantification of Oct4 immunofluorescence in wild-type ES cells treated with DMSO or 1  $\mu\text{g/ml}$  CHX for 3 hours.
- (B) Western blot analysis and quantification of Nanog, Oct4 and H4K16ac levels during addition of and release from CHX.
- (C) Cell number normalized qRT-PCR analysis of pluripotency and lineage markers in ES cells upon 3h of CHX. Data were normalized to Ctrl (DMSO). Error bars show mean  $\pm$  SD of at least 2 biological replicates, each the mean of 3 technical qPCR replicates. No significant differences were detected by Student's t-test with multiple testing correction.
- (D) Schematic and results of acute CHX treatment and differentiation of wild-type ES cells into Embryoid Bodies (EBs). qRT-PCR analysis revealing no differences in pluripotency gene repression and lineage marker induction in EBs derived from ES cells treated for 3h with DMSO or CHX (Ecto. = ectoderm, Endo. = endoderm, Meso. = mesoderm). Data were normalized to the average of *Ubb* and *Rpl7* and are reported as  $\log_2$ -fold change relative to wild-type ES cells. Error bars show mean  $\pm$  SD of 2 biological replicates, each the mean of 3 technical qPCR replicates. No significant differences were detected by Student's t-test with multiple testing correction.
- (E) Analysis of the chromatin, transcriptional, and translational responses to CHX in RA-treated ES cells.
- (F) Analysis of the chromatin, transcriptional, and translational responses to CHX in primary mouse embryonic fibroblasts (MEFs).
- (G) Analysis of the chromatin, transcriptional, and translational responses to CHX in neural stem/progenitor cells (NSPCs) isolated from E12.5 mouse cortex.

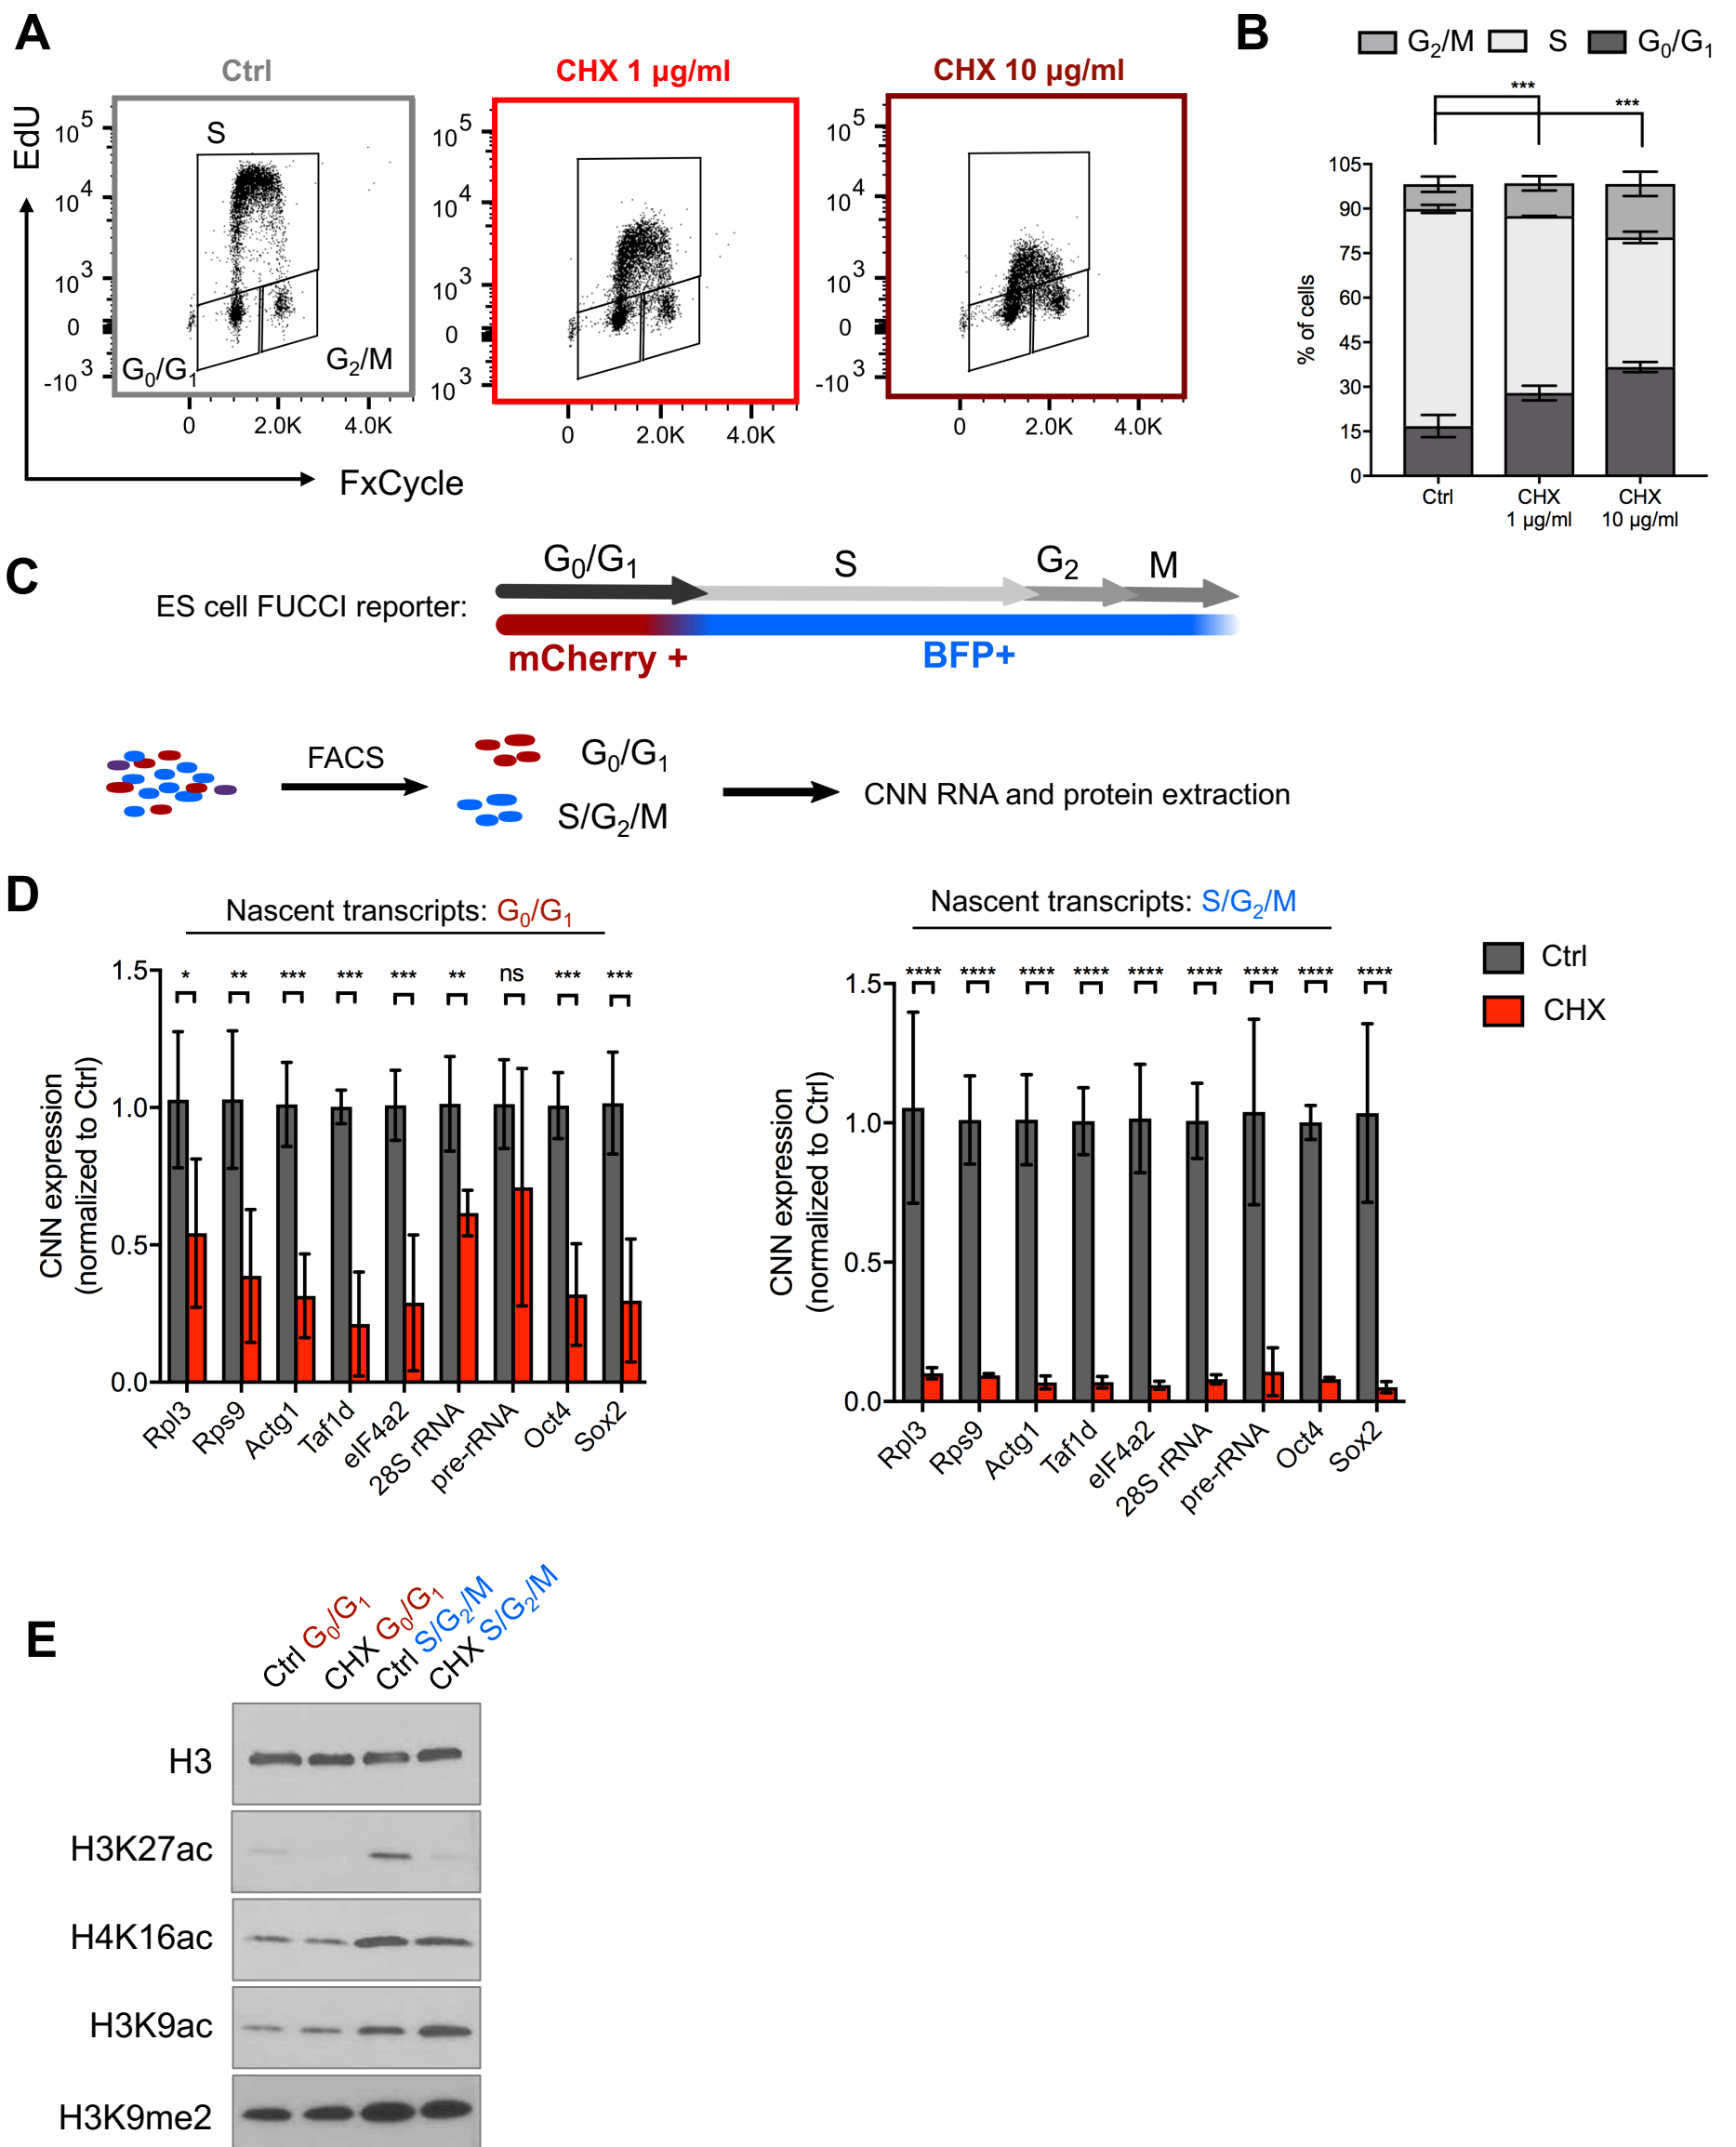

Figure S6

**Figure S6, related to Figure 5. Impact of acute inhibition of translation on the cell cycle in ES cells.**

- (A) Representative flow cytometry plots depicting cell cycle distributions of wild-type ES cells upon DMSO or CHX treatment.
- (B) Quantification of cell cycle stage distributions in DMSO- or CHX-treated ES cells. Error bars show mean  $\pm$  SD of 2 biological replicates. Statistical significance was assessed by Chi-square test. \*\* $p < 0.01$ .
- (C) Schematics of the FUCCI cell line used in this study.
- (D) Nascent RNA capture followed by qRT-PCR in the indicated FACS-isolated populations of DMSO- or CHX-treated (1  $\mu\text{g/ml}$ , 3h) FUCCI. Error bars show mean  $\pm$  SD of 2 biological replicates. Statistical test performed was two-tailed t-test. \*\*\* =  $p < 0.001$ .
- (E) Levels of indicated histone modifications in FACS-isolated populations of DMSO- or CHX-treated (1  $\mu\text{g/ml}$ , 3h) FUCCI cells. Blots show 2 biological replicates.

**A**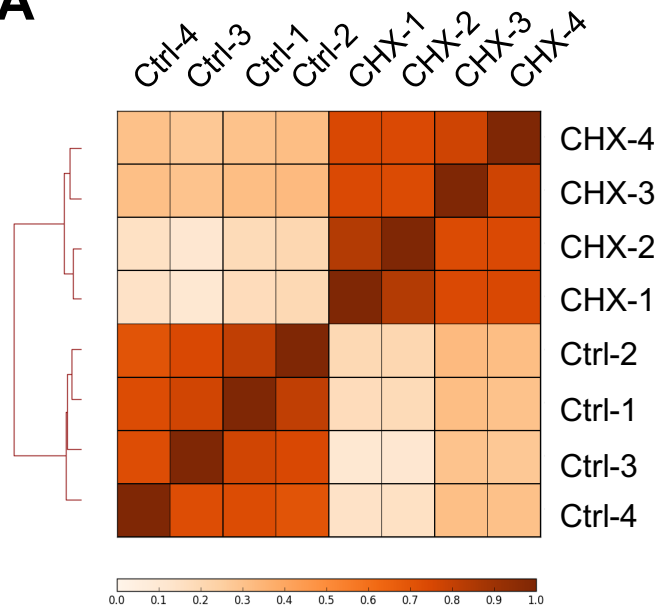**B**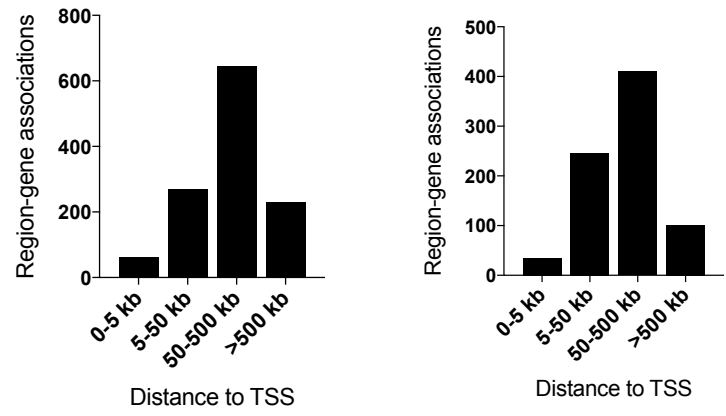**C**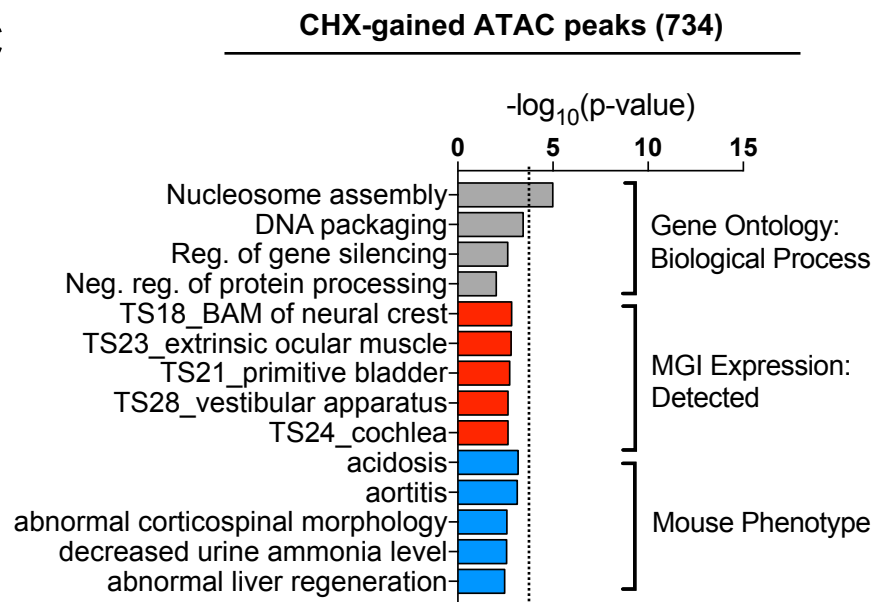**D**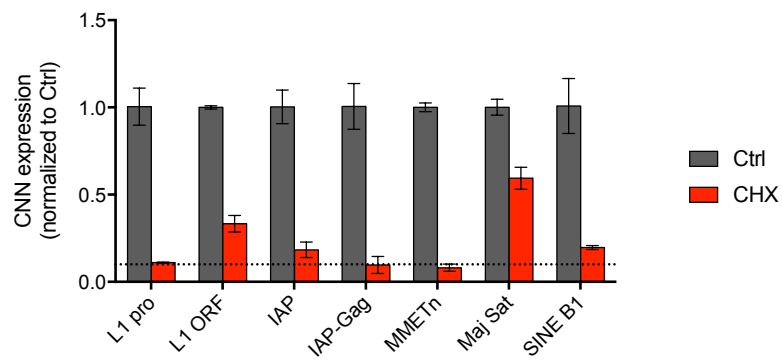**E**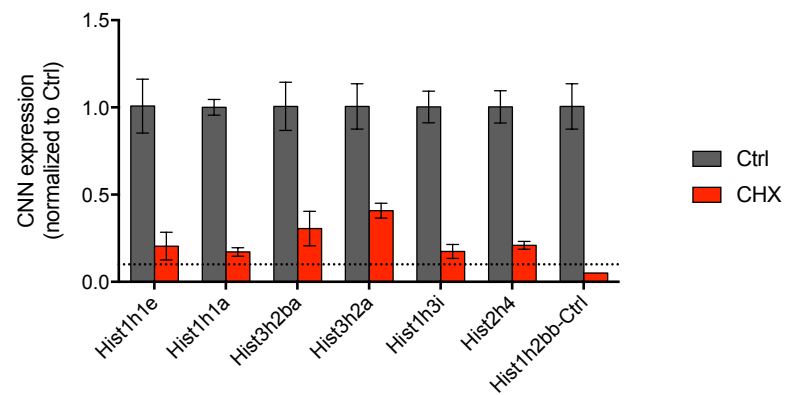

Figure S7

**Figure S7, related to Figure 6. Characterization of chromatin accessibility and expression changes upon inhibition of translation in ES cells.**

- (A) Unsupervised clustering of individual ATAC-seq replicates upon DMSO or CHX treatment for 3 hours. The top 10,787 most variable regions, as determined by Macs14 algorithm, were used for clustering analysis.
- (B) Distance of CHX-gained or CHX-lost regions from transcription start sites (TSS).
- (C) Functional annotation of ATAC-seq peaks lost upon CHX treatment for 3 hours. See Table S9 for the full list of terms.
- (D) Levels of nascent transcription of indicated transposable elements in 3h DMSO- or CHX-treated ES cells, assessed by EU labeling followed by capture and qRT-PCR. Dotted lines represent the average level of downregulation for mRNAs depicted in Figure 4B.
- (E) Levels of nascent transcription of indicated histone genes in 3h DMSO- or CHX-treated ES cells, assessed by EU labeling followed by capture and qRT-PCR. Dotted lines represent the average level of downregulation for mRNAs depicted in Figure 4B.
